# Supplementary material for: The nitrogen responsive transcriptome in potato (Solanum tuberosum L.) reveals significant gene regulatory motifs
Source: PubMed Central journal article supplement (PMC4872257; doi:10.1038/srep26090), 2016-05-19
Supplement: srep26090-s1.pdf [file srep26090-s1.pdf]

# **The nitrogen responsive transcriptome in potato (*Solanum tuberosum* L.) reveals significant gene regulatory motifs**

José Héctor Gálvez, Helen H. Tai, Martin Lague, Bernie J. Zebarth, and Martina V. Strömvik

**Supplementary Table 1: Petiole nitrate concentrations and SPAD measurements for all cultivars and both time-points.**

| <b>Date</b> | <b>Cultivar</b> | <b>N rate</b><br>[kg N ha <sup>-1</sup> ] | <b>Replicate</b><br><b>Number</b> | <b>Petiole Nitrate</b><br><b>Concentration</b> [mg/g] | <b>SPAD readings</b> |
|-------------|-----------------|-------------------------------------------|-----------------------------------|-------------------------------------------------------|----------------------|
| 2012-07-25  | Russet Burbank  | 0                                         | R1                                | 1.2                                                   | 35.8                 |
| 2012-07-25  | Russet Burbank  | 0                                         | R2                                | 3.4                                                   | 38.7                 |
| 2012-07-25  | Russet Burbank  | 0                                         | R3                                | 3.0                                                   | 37.1                 |
| 2012-07-25  | Russet Burbank  | 0                                         | R4                                | 8.8                                                   | 39.5                 |
| 2012-07-25  | Russet Burbank  | 180                                       | R1                                | 25.5                                                  | 37.4                 |
| 2012-07-25  | Russet Burbank  | 180                                       | R2                                | 25.1                                                  | 37.3                 |
| 2012-07-25  | Russet Burbank  | 180                                       | R3                                | 23.8                                                  | 37.2                 |
| 2012-07-25  | Russet Burbank  | 180                                       | R4                                | 27.4                                                  | 40.4                 |
| 2012-07-25  | Shepody         | 0                                         | R1                                | 3.3                                                   | 36.0                 |
| 2012-07-25  | Shepody         | 0                                         | R2                                | 4.1                                                   | 32.5                 |
| 2012-07-25  | Shepody         | 0                                         | R3                                | 0.7                                                   | 30.7                 |
| 2012-07-25  | Shepody         | 0                                         | R4                                | 4.6                                                   | 34.2                 |
| 2012-07-25  | Shepody         | 180                                       | R1                                | 24.4                                                  | 33.3                 |
| 2012-07-25  | Shepody         | 180                                       | R2                                | 25.4                                                  | 37.8                 |
| 2012-07-25  | Shepody         | 180                                       | R3                                | 22.9                                                  | 38.5                 |
| 2012-07-25  | Shepody         | 180                                       | R4                                | 23.3                                                  | 38.6                 |
| 2012-07-25  | Atlantic        | 0                                         | R1                                | 0.5                                                   | 33.5                 |
| 2012-07-25  | Atlantic        | 0                                         | R2                                | 1.9                                                   | 37.0                 |
| 2012-07-25  | Atlantic        | 0                                         | R3                                | 1.0                                                   | 35.7                 |
| 2012-07-25  | Atlantic        | 0                                         | R4                                | 2.0                                                   | 37.4                 |
| 2012-07-25  | Atlantic        | 180                                       | R1                                | 22.2                                                  | 35.7                 |
| 2012-07-25  | Atlantic        | 180                                       | R2                                | 18.0                                                  | 35.1                 |
| 2012-07-25  | Atlantic        | 180                                       | R3                                | 21.5                                                  | 36.4                 |
| 2012-07-25  | Atlantic        | 180                                       | R4                                | 18.8                                                  | 36.8                 |
| 2012-08-08  | Russet Burbank  | 0                                         | R1                                | 0.3                                                   | 34.9                 |
| 2012-08-08  | Russet Burbank  | 0                                         | R2                                | 0.4                                                   | 37.2                 |
| 2012-08-08  | Russet Burbank  | 0                                         | R3                                | 0.9                                                   | 36.4                 |
| 2012-08-08  | Russet Burbank  | 0                                         | R4                                | 5.3                                                   | 38.6                 |
| 2012-08-08  | Russet Burbank  | 180                                       | R1                                | 23.1                                                  | 37.0                 |
| 2012-08-08  | Russet Burbank  | 180                                       | R2                                | 23.5                                                  | 38.8                 |
| 2012-08-08  | Russet Burbank  | 180                                       | R3                                | 21.6                                                  | 38.8                 |
| 2012-08-08  | Russet Burbank  | 180                                       | R4                                | 19.4                                                  | 39.8                 |
| 2012-08-08  | Shepody         | 0                                         | R1                                | 2.4                                                   | 30.3                 |
| 2012-08-08  | Shepody         | 0                                         | R2                                | 1.8                                                   | 31.8                 |
| 2012-08-08  | Shepody         | 0                                         | R3                                | 0.4                                                   | 26.2                 |
| 2012-08-08  | Shepody         | 0                                         | R4                                | 0.8                                                   | 28.8                 |
| 2012-08-08  | Shepody         | 180                                       | R1                                | 22.8                                                  | 35.0                 |
| 2012-08-08  | Shepody         | 180                                       | R2                                | 23.2                                                  | 35.6                 |
| 2012-08-08  | Shepody         | 180                                       | R3                                | 23.3                                                  | 36.8                 |
| 2012-08-08  | Shepody         | 180                                       | R4                                | 23.9                                                  | 35.1                 |
| 2012-08-08  | Atlantic        | 0                                         | R1                                | 0.2                                                   | 31.5                 |
| 2012-08-08  | Atlantic        | 0                                         | R2                                | 0.2                                                   | 33.6                 |
| 2012-08-08  | Atlantic        | 0                                         | R3                                | 0.2                                                   | 33.9                 |
| 2012-08-08  | Atlantic        | 0                                         | R4                                | 0.7                                                   | 32.8                 |
| 2012-08-08  | Atlantic        | 180                                       | R1                                | 21.4                                                  | 36.0                 |
| 2012-08-08  | Atlantic        | 180                                       | R2                                | 26.5                                                  | 34.9                 |
| 2012-08-08  | Atlantic        | 180                                       | R3                                | 28.5                                                  | 35.7                 |
| 2012-08-08  | Atlantic        | 180                                       | R4                                | 19.5                                                  | 36.5                 |

**Supplementary Table 2:** Plant dry biomass and fresh tuber yields for all cultivars at harvest.

| <b>Cultivar</b> | <b>N rate</b> [kg N ha <sup>-1</sup> ] | <b>Replicate Number</b> | <b>Plant Dry Biomass</b> [t/ha] | <b>Fresh Tuber Yield</b> [t/ha] |
|-----------------|----------------------------------------|-------------------------|---------------------------------|---------------------------------|
| Russet Burbank  | 0                                      | R1                      | 6.82                            | 36.0                            |
| Russet Burbank  | 0                                      | R2                      | 8.64                            | 33.7                            |
| Russet Burbank  | 0                                      | R3                      | 6.98                            | 37.6                            |
| Russet Burbank  | 0                                      | R4                      | 8.45                            | 29.8                            |
| Russet Burbank  | 180                                    | R1                      | 7.75                            | 34.8                            |
| Russet Burbank  | 180                                    | R2                      | 8.03                            | 44.9                            |
| Russet Burbank  | 180                                    | R3                      | 9.74                            | 31.1                            |
| Russet Burbank  | 180                                    | R4                      | 10.54                           | 42.9                            |
| Shepody         | 0                                      | R1                      | 8.81                            | 32.6                            |
| Shepody         | 0                                      | R2                      | 7.86                            | 28.3                            |
| Shepody         | 0                                      | R3                      | 7.18                            | 28.1                            |
| Shepody         | 0                                      | R4                      | 8.42                            | 35.5                            |
| Shepody         | 180                                    | R1                      | 8.29                            | 35.6                            |
| Shepody         | 180                                    | R2                      | 10.03                           | 37.3                            |
| Shepody         | 180                                    | R3                      | 9.90                            | 36.9                            |
| Shepody         | 180                                    | R4                      | 8.74                            | 34.4                            |
| Atlantic        | 0                                      | R1                      | 7.81                            | 37.0                            |
| Atlantic        | 0                                      | R2                      | 11.11                           | 43.1                            |
| Atlantic        | 0                                      | R3                      | 9.81                            | 39.8                            |
| Atlantic        | 0                                      | R4                      | 8.53                            | 42.4                            |
| Atlantic        | 180                                    | R1                      | 9.95                            | 45.7                            |
| Atlantic        | 180                                    | R2                      | 11.42                           | 43.2                            |
| Atlantic        | 180                                    | R3                      | 10.64                           | 41.1                            |
| Atlantic        | 180                                    | R4                      | 10.31                           | 43.4                            |

**Supplementary Table 3:** Total number of differentially expressed genes for different potato cultivars.

| <i>S. tuberosum</i><br>cultivar | Time-point 1<br>July 25, 2012 |                 | Time-point 2<br>Aug. 8, 2012 |                 |
|---------------------------------|-------------------------------|-----------------|------------------------------|-----------------|
|                                 | Over-expressed                | Under-expressed | Over-expressed               | Under-expressed |
| Shepody                         | 182                           | 35              | 218                          | 52              |
| Russet Burbank                  | 64                            | 47              | 116                          | 18              |
| Atlantic                        | 393                           | 33              | 149                          | 40              |

**Supplementary Table 4: Genes that were differentially expressed in only one of the two time points.**

| <b>Time point</b>           | <b>Gene ID</b> | <b>Gene Description and Interpro Domain<sup>S</sup></b>                                                                         |
|-----------------------------|----------------|---------------------------------------------------------------------------------------------------------------------------------|
| <b>Over expressed genes</b> |                |                                                                                                                                 |
| 2012-07-25                  | Sotub01g007180 | AMP-dependent synthetase and ligase; IPR011614 Catalase, N-terminal                                                             |
| 2012-07-25                  | Sotub02g012390 | Coiled-coil domain-containing protein 109A; IPR006769 Protein of unknown function DUF607                                        |
| 2012-07-25                  | Sotub03g018730 | Glutamate dehydrogenase; IPR014362 Glutamate dehydrogenase                                                                      |
| 2012-07-25                  | Sotub03g023340 | BTB/POZ domain-containing protein; IPR000197 Zinc finger, TAZ-type                                                              |
| 2012-07-25                  | Sotub03g031100 | Heat shock protein; IPR013126 Heat shock protein 70                                                                             |
| 2012-07-25                  | Sotub04g025700 | ASR4 protein (Fragment); IPR003496 ABA/WDS induced protein                                                                      |
| 2012-07-25                  | Sotub04g035440 | Cellular retinaldehyde-binding/triple function C-terminal; IPR001251 Cellular retinaldehyde-binding/triple function, C-terminal |
| 2012-07-25                  | Sotub05g007580 | Myb family transcription factor; IPR006447 Myb-like DNA-binding region, SHAQKYF class                                           |
| 2012-07-25                  | Sotub05g008150 | 3-ketoacyl-CoA synthase; IPR012392 Very-long-chain 3-ketoacyl-CoA synthase                                                      |
| 2012-07-25                  | Sotub06g006790 | Plant-specific domain TIGR01615 family protein; IPR006502 Protein of unknown function DUF506, plant                             |
| 2012-07-25                  | Sotub06g011740 | Gamma-glutamyl phosphate reductase; IPR005766 Delta l-pyrroline-5-carboxylate synthetase                                        |
| 2012-07-25                  | Sotub06g023090 | Solute carrier family 2, facilitated glucose transporter member 3; IPR003663 Sugar/inositol transporter                         |
| 2012-07-25                  | Sotub06g027390 | Cysteine proteinase inhibitor; IPR006043 Xanthine/uracil/vitamin C permease                                                     |
| 2012-07-25                  | Sotub08g005550 | PII uridylyl-transferase; IPR002912 Amino acid-binding ACT                                                                      |
| 2012-07-25                  | Sotub11g007070 | Plant-specific domain TIGR01615 family protein; IPR006502 Protein of unknown function DUF506, plant                             |
| 2012-07-25                  | Sotub11g007100 | Plant-specific domain TIGR01615 family protein; IPR006502 Protein of unknown function DUF506, plant                             |
| 2012-07-25                  | Sotub11g020550 | Hexokinase 6; IPR001312 Hexokinase                                                                                              |
| 2012-08-08                  | Sotub02g015720 | FAD binding domain-containing protein; IPR006094 FAD linked oxidase, N-terminal                                                 |
| 2012-08-08                  | Sotub02g021000 | Plant-specific domain TIGR01615 family protein; IPR006502 Protein of unknown function DUF506, plant                             |
| 2012-08-08                  | Sotub02g031260 | Arabinogalactan                                                                                                                 |
| 2012-08-08                  | Sotub03g012290 | Kunitz-type protease inhibitor; IPR002160 Proteinase inhibitor I3, Kunitz legume                                                |
| 2012-08-08                  | Sotub03g012340 | Kunitz-type protease inhibitor; IPR002160 Proteinase inhibitor I3, Kunitz legume                                                |
| 2012-08-08                  | Sotub03g012360 | Proteinase inhibitor II; IPR003465 Proteinase inhibitor I20, Pin2                                                               |
| 2012-08-08                  | Sotub03g015880 | Kunitz trypsin inhibitor 4; IPR011065 Kunitz inhibitor ST1-like                                                                 |
| 2012-08-08                  | Sotub03g015970 | Aspartic protease inhibitor 1; IPR002160 Proteinase inhibitor I3, Kunitz legume                                                 |
| 2012-08-08                  | Sotub03g023330 | Peptide methionine sulfoxide reductase MsrA; IPR002569 Methionine sulfoxide reductase A                                         |
| 2012-08-08                  | Sotub03g035920 | Taurine catabolism dioxygenase TauD/TfdA; IPR003819 Taurine catabolism dioxygenase TauD/TfdA                                    |
| 2012-08-08                  | Sotub04g028270 | Phospho-2-dehydro-3-deoxyheptonate aldolase 1; IPR002480 DAHP synthetase, class II                                              |
| 2012-08-08                  | Sotub05g018510 | GDSL esterase/lipase At2g04570; IPR001087 Lipase, GDSL                                                                          |
| 2012-08-08                  | Sotub05g021450 | Glucose-6-phosphate/phosphate translocator 2; IPR004696 Tpt phosphate/phosphoenolpyruvate translocator                          |
| 2012-08-08                  | Sotub05g027780 | High affinity sulfate transporter 2; IPR001902 Sulphate anion transporter                                                       |
| 2012-08-08                  | Sotub06g025010 | Cortical cell-delineating protein; IPR013770 Plant lipid transfer protein and hydrophobic protein, helical                      |
| 2012-08-08                  | Sotub06g026740 | Chlorophyll a-b binding protein 4, chloroplastic; IPR001344 Chlorophyll A-B binding protein                                     |
| 2012-08-08                  | Sotub06g027990 | Unknown Protein                                                                                                                 |
| 2012-08-08                  | Sotub06g030410 | Beta-D-glucosidase; IPR001764 Glycoside hydrolase, family 3, N-terminal                                                         |
| 2012-08-08                  | Sotub06g030610 | Cysteine proteinase inhibitor; IPR000010 Proteinase inhibitor I25, cystatin                                                     |
| 2012-08-08                  | Sotub07g016530 | Cellulose synthase-like protein H1; IPR005150 Cellulose synthase                                                                |
| 2012-08-08                  | Sotub07g016550 | UDP glucosyltransferase; IPR002213 UDP-glucuronosyl/UDP-glucosyltransferase                                                     |
| 2012-08-08                  | Sotub07g016570 | 1-aminocyclopropane-1-carboxylate oxidase; IPR005123 Oxoglutarate and iron-dependent oxygenase                                  |
| 2012-08-08                  | Sotub08g024210 | Exostosin family protein; IPR004263 Exostosin-like                                                                              |

---

|            |                |                                                                                       |
|------------|----------------|---------------------------------------------------------------------------------------|
| 2012-08-08 | Sotub08g028270 | Methanol inducible protein                                                            |
| 2012-08-08 | Sotub09g008430 | Threonine dehydratase biosynthetic; IPR005787 Threonine dehydratase I                 |
| 2012-08-08 | Sotub09g023600 | Homocysteine s-methyltransferase; IPR003726 Homocysteine S-methyltransferase          |
| 2012-08-08 | Sotub09g026640 | Proteinase inhibitor I; IPR000864 Proteinase inhibitor I13, potato inhibitor I        |
| 2012-08-08 | Sotub09g028690 | Selenium binding protein; IPR008826 Selenium-binding protein                          |
| 2012-08-08 | Sotub09g031120 | Unknown Protein; IPR006706 Extensin-like region                                       |
| 2012-08-08 | Sotub10g021050 | UDP glucosyltransferase; IPR002213 UDP-glucuronosyl/UDP-glucosyltransferase           |
| 2012-08-08 | Sotub11g024220 | Superoxide dismutase; IPR001424 Superoxide dismutase, copper/zinc binding             |
| 2012-08-08 | Sotub12g007850 | Cytosol aminopeptidase family protein; IPR011356 Peptidase M17, leucyl aminopeptidase |
| 2012-08-08 | Sotub12g008260 | Unknown Protein                                                                       |
| 2012-08-08 | Sotub12g028670 | Cation transport regulator-like protein 2; IPR006840 ChaC-like protein                |

**Under expressed genes**

|            |                |                                                                                     |
|------------|----------------|-------------------------------------------------------------------------------------|
| 2012-07-25 | Sotub02g017430 | Purine permease family protein; IPR004853 Protein of unknown function DUF250        |
| 2012-07-25 | Sotub08g025870 | Primary amine oxidase; IPR000269 Copper amine oxidase                               |
| 2012-07-25 | Sotub09g010630 | Hydrolase alpha/beta fold family protein; IPR000073 Alpha/beta hydrolase fold-1     |
| 2012-08-08 | Sotub12g012740 | Chloroplast lipocalin; IPR000566 Lipocalin-related protein and Bos/Can/Equ allergen |

---

\$ Gene descriptions (including InterPro domains) obtained from the ITAG1.0 annotation system (The Tomato Genome Consortium 2012)
